# Supplementary material
Source: PubMed Central journal article supplement (PMC3080974)
Supplement: 1015674108_pnas.201015674SI.pdf [file 1015674108_pnas.201015674SI.pdf]

# Supporting Information

Chou et al. 10.1073/pnas.1015674108

## SI Materials and Methods

**Subjects.** Eligible subjects were women between 18 and 35 y old who had had secondary hypothalamic amenorrhea for at least 6 mo coincident with a period of strenuous exercise and/or low body weight. All participants were within 15% of ideal body weight, and their weights had been stable for at least 6 mo at the time of screening. Fasting morning leptin levels were  $<5$  ng/mL before entering the study. Study participants did not have significant coexisting medical conditions, including active eating disorder, depression or other psychiatric disease, alcoholism, drug or tobacco use, malignancies, renal or hepatic disease, diabetes mellitus, myocardial ischemia, gastrointestinal malabsorption, or anemia (hemoglobin  $\leq 10$  g/dL). Women with amenorrhea secondary to other causes, specifically hyperprolactinemia, hypothyroidism, hyperthyroidism, Cushing's syndrome, congenital adrenal hyperplasia, polycystic ovarian syndrome, or primary ovarian failure, were excluded from the study. Women who had taken medications that might affect hormone measurements or bone mineral density, including glucocorticoids, antiseizure medications, thyroid hormones, or estrogens, within 3 mo of screening were excluded also. Additionally, women who were breastfeeding, pregnant, or planning pregnancy were excluded from study participation. Pregnancy tests were performed at the screening and all follow-up visits. Participants were required to use a double-barrier methods (diaphragm with intravaginal spermicide, cervical cap, male or female condom with spermicide) and/or abstinence to prevent pregnancy.

**Study Design.** Twenty participants provided written informed consent to participate in this randomized, double-blinded, placebo-controlled study. The protocol was approved by the institutional review board of Beth Israel Deaconess Medical Center (BIDMC).

The participants were assigned randomly in a 1:1 ratio to receive either metreleptin or placebo. All participants were provided calcium (600 mg twice daily) and vitamin D (400 international units daily) supplements. During the 36-wk study, participants had visits to the General Clinical Research Center (GCRC) of BIDMC every 4 wk for assessments (including blood tests, body composition, and/or resting energy expenditure) as well as to monitor for potential side effects and review the injection technique. Before the inpatient assessment every 12 wk, participants were requested to keep a 3-d food diary (recording all caloric intake for 1 weekend day and 2 weekdays). They were asked to keep exercise records and to document any menstrual bleeding throughout the study. Participants returned at week 52 for a follow-up visit 16 wk after discontinuing the study medication. Subjects who had a menstrual cycle were instructed to return at day 21 for measurement of serum progesterone to assess whether ovulation had occurred.

Metreleptin or matching placebo was self-administered by s.c. injection once daily between 7:00 PM and 11:00 PM for 36 wk. The dose of metreleptin or placebo was calculated based on the subject's weight to achieve physiologic to supraphysiologic leptin levels. The initial dose of metreleptin or placebo for all subjects was 0.08 mg/kg and was continued for 12 wk. At the end of 12 wk, subjects who had begun menstruating continued the same dose through week 36. Subjects who had not started menstruating at week 12 had their dose increased to 0.12 mg/kg. Their weights were checked at each visit, and the treatment doses were adjusted to maintain stable weights. Specifically, doses were reduced by 0.04 mg/kg if a subject lost  $>5\%$  of her baseline weight. Subjects were withdrawn from the study if body weight decreased

to  $<8\%$  of baseline for more than one visit or to  $<80\%$  of ideal body weight.

Fasting blood samples were collected at each visit for measurement of serum leptin, free leptin, antileptin antibodies, luteinizing hormone (LH), follicle-stimulating hormone (FSH), estradiol, progesterone, testosterone, inhibin B, thyroid-stimulating hormone (TSH), free thyroxine (fT4), free triiodothyronine (fT3), cortisol, insulin-like growth factor-1 (IGF1), IGF binding protein 3 (IGFBP-3), prolactin, osteocalcin, bone-specific alkaline phosphatase (BSAP), osteocalcin, osteoprotegerin, and C-telopeptides of type 1 collagen (CTX). A urine sample also was collected approximately 2 h after the first morning void for urinary N-telopeptides of type 1 collagen (NTX), creatinine, and free cortisol measurements.

Bone density (total, spine, hip, and radius) and body composition (total body mass, fat mass, and lean mass) were measured using dual-energy X-ray absorptiometry (DEXA) (Hologic QDR-4500; Hologic) in whole-body array mode at baseline and every 12 wk after an overnight stay at the GCRC. The resting energy expenditure was measured directly using a SensorMedics  $V_{\max}$  Encore equipment (VIASYS Respiratory Care Inc.) in the morning on awakening and in the fasted state before any other testing. The food diaries were analyzed by Nutritionist Pro, version 4.3.0 (Axxya Systems).

**Biochemical Analysis.** The following hormone levels were measured using immunoassays: leptin (Millipore); LH, estradiol, progesterone, testosterone, cortisol, IGF1, IGFBP-3, prolactin, and inhibin B (Diagnostic Systems Laboratory); FSH and TSH (ALPCO); BSAP and osteocalcin (Quidel); osteoprotegerin (R&D Systems); fT3 and fT4 (Immulin Siemens Healthcare Diagnostics); CTX (Immunodiagnostic Systems Inc.); and urinary NTX (Wampole Laboratories). Creatinine was assayed using the Creatinine Jaffe Method on the Roche Modular P Analyzer (Roche Diagnostics). All samples from each subject were analyzed in duplicate in the same assay. Assay sensitivities as well as interassay and intraassay coefficients of variation (CV) were similar to those reported by the manufacturer or in previous studies (1–3).

Serum free leptin was measured by RIA (Millipore) with a sensitivity of 0.5 ng/mL, intraassay CV of 3.4–8.9%, and interassay CV of 3.0–6.2%. Serum for all free leptin measurements underwent a preincubation water bath for 2 h at 37 °C, followed by treatment with equal volume of Gamma PEG (ImmuCor, Inc.) for 10 min and vortexing of the tubes every 2–5 min. After incubation the samples were centrifuged at  $585 \times g$  for 20 min, and the sample was removed for assaying without disturbing the pellet. Reported free leptin values have been corrected for 1:2 dilution by pretreatment PEG solution.

Serum antileptin antibody levels were determined by a colorimetric sandwich ELISA developed in house. Briefly, 50  $\mu$ L of recombinant human leptin (R&D Systems) at a final concentration of 10  $\mu$ g/mL in PBS was plate-bound to a 96-well ELISA plate (PBI International SpA). After 16-h incubation at 4 °C, the plates were washed extensively with PBS-Tween 20 0.05%, blocked with 200  $\mu$ L of PBS/10% FCS for 2 h, and washed repeatedly. Diluted sera in PBS-0.05% Tween20/10% FCS (1:10–1:1,000) were added at 100  $\mu$ L per well and incubated for 4 h at room temperature. After five washes, goat anti-human polyvalent immunoglobulins alkaline phosphatase-conjugated Abs (Sigma-Aldrich), diluted 1:30,000 in PBS-Tween20 0.05%/10% FCS, was added at 100  $\mu$ L per well for 1 h. The reaction was developed with Sigma-Fast PNPP (p-nitrophenyl phosphate, al-



**Table S2. Additional changes in neuroendocrine axes and markers of bone turnover over time**

| Analyte                             | Group       | Week 0<br>(baseline) | Week 12     | Week 24     | Week 36      | Week 52<br>(follow-up) | <i>P</i> (trt)* | <i>P</i> (trt*<br>time) <sup>†</sup> | <i>P</i> (follow-up) <sup>‡</sup> |
|-------------------------------------|-------------|----------------------|-------------|-------------|--------------|------------------------|-----------------|--------------------------------------|-----------------------------------|
| <b>Hormones</b>                     |             |                      |             |             |              |                        |                 |                                      |                                   |
| Leptin BP(ng/mL)                    | Metreleptin | 34.7 ± 2.6           | 31.3 ± 2.8  | 32.9 ± 3.5  | 31.6 ± 3.2   | 39.9 ± 3.1             | 0.93            | 0.32                                 | 0.10                              |
|                                     | Placebo     | 30.8 ± 2.3           | 31.6 ± 2.4  | 32.2 ± 2.9  | 31.5 ± 2.5   | 31.3 ± 3.6             |                 |                                      |                                   |
| LH (IU/L)                           | Metreleptin | 8.8 ± 3.3            | 11.8 ± 4.4  | 9.7 ± 3.5   | 13.4 ± 5.3   | 8.2 ± 3.2              | 0.86            | 0.4                                  | 0.40                              |
|                                     | Placebo     | 14.3 ± 5.0           | 8.7 ± 2.2   | 12.9 ± 3.9  | 10.0 ± 3.6   | 5.4 ± 3.4              |                 |                                      |                                   |
| FSH (IU/L)                          | Metreleptin | 5.3 ± 0.5            | 5.0 ± 0.4   | 4.9 ± 0.4   | 5.0 ± 0.6    | 5.0 ± 0.6              | 0.69            | 0.7                                  | 0.99                              |
|                                     | Placebo     | 4.9 ± 0.5            | 4.9 ± 0.4   | 4.7 ± 0.5   | 4.8 ± 0.5    | 5.0 ± 0.7              |                 |                                      |                                   |
| Testosterone(ng/mL)                 | Metreleptin | 42.1 ± 4.3           | 36.0 ± 4.7  | 31.5 ± 4.0  | 31.5 ± 4.2   | 41.3 ± 5.3             | 0.57            | 0.88                                 | 0.08                              |
|                                     | Placebo     | 41.3 ± 6.9           | 41.6 ± 7.9  | 36.5 ± 7.1  | 37.4 ± 7.2   | 26.0 ± 6.0             |                 |                                      |                                   |
| Inhibin B (pg/mL)                   | Metreleptin | 43.0 ± 10.5          | 71.4 ± 13.9 | 65.5 ± 14.9 | 72.5 ± 17.18 | 76.5 ± 7.5             | 0.07            | 0.27                                 | 0.005                             |
|                                     | Placebo     | 64.0 ± 13.0          | 63.0 ± 10.7 | 60.9 ± 10.3 | 54.4 ± 8.4   | 40.5 ± 4.7             |                 |                                      |                                   |
| TSH(μIU/mL)                         | Metreleptin | 1.8 ± 0.2            | 2.1 ± 0.3   | 2.2 ± 0.4   | 1.8 ± 0.3    | 2.0 ± 0.3              | 0.78            | 0.70                                 | 0.97                              |
|                                     | Placebo     | 1.9 ± 0.2            | 2.1 ± 0.2   | 1.9 ± 0.2   | 1.9 ± 0.2    | 2.1 ± 0.3              |                 |                                      |                                   |
| fT3 (pg/mL)                         | Metreleptin | 1.90 ± 0.17          | 2.28 ± 0.19 | 2.22 ± 0.24 | 2.05 ± 0.21  | 1.83 ± 0.22            | 0.49            | 0.02                                 | 1                                 |
|                                     | Placebo     | 2.09 ± 0.13          | 1.87 ± 0.07 | 2.04 ± 0.12 | 1.94 ± 0.12  | 1.83 ± 0.06            |                 |                                      |                                   |
| fT4 (ng/dL)                         | Metreleptin | 1.00 ± 0.08          | 1.03 ± 0.08 | 1.07 ± 0.08 | 1.05 ± 0.08  | 1.08 ± 0.09            | 0.43            | 0.95                                 | 0.47                              |
|                                     | Placebo     | 0.91 ± 0.08          | 0.98 ± 0.09 | 0.99 ± 0.10 | 1.00 ± 0.10  | 0.97 ± 0.11            |                 |                                      |                                   |
| Urinary free<br>cortisol:creatinine | Metreleptin | 2.2 ± 0.2            | 2.3 ± 0.3   | 3.4 ± 0.6   | 2.3 ± 0.6    |                        | 0.83            | 0.95                                 |                                   |
|                                     | Placebo     | 2.0 ± 0.2            | 2.8 ± 0.6   | 3.5 ± 1.0   | 3.5 ± 1.0    |                        |                 |                                      |                                   |
| IGFBP-3 (μg/mL)                     | Metreleptin | 90.4 ± 4.0           | 88.0 ± 4.4  | 88.2 ± 3.6  | 87.3 ± 3.6   | 83.9 ± 8.3             | 0.23            | 0.81                                 | 0.93                              |
|                                     | Placebo     | 83.2 ± 2.7           | 84.1 ± 2.5  | 83.5 ± 1.7  | 83.3 ± 2.5   | 84.7 ± 3.6             |                 |                                      |                                   |
| Prolactin(ng/mL)                    | Metreleptin | 10.0 ± 1.3           | 10.3 ± 1.6  | 11.2 ± 1.5  | 8.5 ± 1.3    | 7.8 ± 1.5              | 0.78            | 0.56                                 | 0.38                              |
|                                     | Placebo     | 11.3 ± 1.7           | 9.6 ± 1.1   | 10.8 ± 1.7  | 8.9 ± 1.0    | 6.3 ± 0.9              |                 |                                      |                                   |
| <b>Bone markers</b>                 |             |                      |             |             |              |                        |                 |                                      |                                   |
| CTX (ng/mL)                         | Metreleptin | 1.09 ± 0.11          | 1.16 ± 0.14 | 1.02 ± 0.15 | 1.12 ± 0.14  | 0.96 ± 0.24            | 0.13            | 0.39                                 | 0.24                              |
|                                     | Placebo     | 0.97 ± 0.14          | 0.84 ± 0.15 | 0.79 ± 0.11 | 0.82 ± 0.10  | 0.64 ± 0.06            |                 |                                      |                                   |
| Osteoprotegerin<br>(pg/mL)          | Metreleptin | 1023 ± 73            | 1064 ± 80   | 1131 ± 77   | 1142 ± 62    | 1168 ± 134             | 0.2371          | 0.168                                | 0.98                              |
|                                     | Placebo     | 947 ± 103            | 978 ± 144   | 936 ± 119   | 1026 ± 88    | 1176 ± 208             |                 |                                      |                                   |

All data are presented as mean ± SE. For analysis, the last observation was carried forward to yield *n* = 10 for the metreleptin group and *n* = 9 for the placebo group. On-treatment analysis yielded similar results (data not shown). Log transformed data were used for LH and fT3. Baseline level was adjusted for in the model for inhibin B. Overall *P* values were based on repeated measure ANOVA from baseline and every 4 wk through week 36 for all variables except IGFBP-3, which was analyzed using repeated measure ANOVA from baseline, week 12, week 24, and week 36.

\*Effect of metreleptin and placebo treatment.

<sup>†</sup>Metreleptin and placebo treatment over time interaction.

<sup>‡</sup>One-way ANOVA was used to compare the difference between metreleptin and placebo treatment groups at week 52 follow-up.
